# Supplementary material for: Structure design and performance of photomultiplication-type organic photodetectors based on an aggregation-induced emission material
Source: Royal Society of Chemistry journal article supplement (doi:10.1039/c9nr09386a), 2020-01-01
Supplement: c9nr09386a1.pdf [file c9nr09386a1.pdf]

## Electronic Supplementary Information

### Structure Design and Performance of Photomultiplication-Type Organic Photodetector Based on Aggregation Induced Emission Material

Dechao Guo<sup>a</sup>, Zeng Xu<sup>a</sup>, Dezhi Yang<sup>a\*</sup>, Dongge Ma<sup>a\*</sup>, Benzhong Tang<sup>a, b</sup>, Agafonov Vadim<sup>c</sup>

<sup>a</sup> Center for Aggregation-Induced Emission, Institute of Polymer Optoelectronic Materials and Devices, Key Laboratory of Luminescence from Molecular Aggregated of Guangdong Province, State Key Laboratory of Luminescent Materials and Devices, South China University of Technology, Guangzhou 510640, People's Republic of China. E-mail: [msdgm@scut.edu.cn](mailto:msdgm@scut.edu.cn); [msdzyang@scut.edu.cn](mailto:msdzyang@scut.edu.cn)

<sup>b</sup> Department of Chemistry, Hong Kong Branch of Chinese National Engineering Research Center for Tissue Restoration and Reconstruction, The Hong Kong University of Science & Technology, Clear Water Bay, Kowloon, Hong Kong, China

<sup>c</sup> Moscow Institute of Physics and Technology, Dolgoprudny, Moscow Region, 141700, Russia

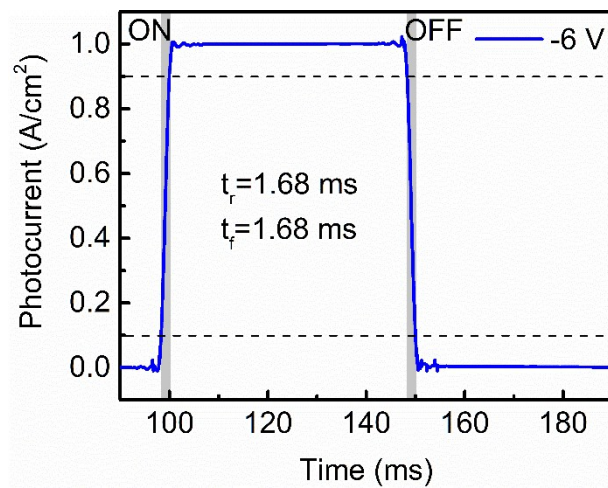

**Figure S1.** Transient photocurrent response ( $J$ - $t$  curve) of the resulting OPDs without MoO<sub>3</sub> at a pulse frequency of 10 Hz and -6 V bias.
